# Supplementary material for: Demographics and Prevalence of HBV, HCV, and Syphilis Among the Female Sex Workers of Daulatdia, Bangladesh: A Cross-Sectional Study
Source: MDPI journal article supplement (doi:10.3390/venereology5010003), 2026-01-07
Supplement: s1 [file venereology-3968490-supplementary.pdf › venereology-3968490-supplementary.pdf]

# Demographics and Prevalence of HBV, HCV, and Syphilis among the Female Sex Workers of Daulatdia, Bangladesh

## Survey Questionnaire

| ID No. / Form Code | Date of Data Collection |
|--------------------|-------------------------|
|                    |                         |

### 1. General Information

| Question No. | Question                                                                                                                                                                                                                                                                                           | Coding Category                           | Code |
|--------------|----------------------------------------------------------------------------------------------------------------------------------------------------------------------------------------------------------------------------------------------------------------------------------------------------|-------------------------------------------|------|
| 1.1          | Name: .....<br>(As per birth certificate, if available)                                                                                                                                                                                                                                            |                                           |      |
| 1.2          | The Public Health Center is conducting a baseline survey on the awareness and knowledge level of sex workers regarding STD prevention. Are you willing to participate in the survey and answer the questions?<br><br>(If Yes, proceed to the next section. If No, the interview is not applicable) | 1. Yes<br>2. No                           |      |
| 1.3          | Age (in full years)<br>(As per birth certificate, if available)                                                                                                                                                                                                                                    |                                           |      |
| 1.4          | Gender                                                                                                                                                                                                                                                                                             | 1. Female<br>2. Other                     |      |
| 1.5          | How many family members currently live with you inside the brothel?                                                                                                                                                                                                                                |                                           |      |
| 1.6          | Educational Qualification                                                                                                                                                                                                                                                                          | 1. Primary (1-5)<br>2. High School (6-10) |      |

|      |                                                                                                                                      |                                                                                                                                                                                                  |  |
|------|--------------------------------------------------------------------------------------------------------------------------------------|--------------------------------------------------------------------------------------------------------------------------------------------------------------------------------------------------|--|
|      |                                                                                                                                      | 3. SSC<br>4. HSC and above<br>5. Can read and write<br>6. Literate<br>7. Illiterate                                                                                                              |  |
| 1.7  | Marital Status                                                                                                                       | 1. Unmarried<br>2. Unmarried but living with a partner<br>3. Married and living with a husband<br>4. Married but not living with a husband<br>5. Divorced<br>6. Widow<br>7. Other (Write ..... ) |  |
| 1.8  | How long have you been working in the brothel?<br>(Write in months)                                                                  |                                                                                                                                                                                                  |  |
| 1.9  | You are a.....                                                                                                                       | 1. Full-time worker<br>2. Part-time worker                                                                                                                                                       |  |
| 1.10 | How many sexual partners did you have in the last 7 days?<br>(Excluding husband)                                                     |                                                                                                                                                                                                  |  |
| 1.11 | How many clients do you handle per day on average?                                                                                   |                                                                                                                                                                                                  |  |
| 1.12 | What was the maximum number of sexual partners you had in a single day?                                                              |                                                                                                                                                                                                  |  |
| 1.13 | What types of clients do you handle mostly?                                                                                          | 1. Regular<br>2. New                                                                                                                                                                             |  |
| 1.14 | Do you use/have you ever used a syringe/needle to use any drug related to sexual activity (i.e. sex sex-stimulating drugs or other)? | 1. Yes<br>2. No                                                                                                                                                                                  |  |
| 1.15 | If yes, how often do you use it?                                                                                                     | 1. Very often<br>2. Occasionally                                                                                                                                                                 |  |

## 2. STD-related Knowledge

| Question No. | Question                                                                                        | Coding Category                                                                                       | Code |
|--------------|-------------------------------------------------------------------------------------------------|-------------------------------------------------------------------------------------------------------|------|
| 2.1          | Have you ever heard anything about sexual transmitted diseases (STD)?                           | 1. Yes<br>2. No                                                                                       |      |
| 2.2          | If you have heard from, where have you heard about it?<br><br>(Multiple answers possible, tick) | 1. Radio<br>2. Television<br>3. NGO worker<br>4. Public Health worker<br>5. Other (Write.....)        |      |
| 2.3          | What STDs do you know about?<br><br>(Multiple answers possible, tick)                           | 1. AIDS/HIV<br>2. Syphilis<br>3. HCV<br>4. HBV<br>5. Gonorrhea<br>6. Herpes<br>7. Other (Write .....) |      |
| 2.4          | Can STDs be fatal?                                                                              | 1. Yes<br>2. No<br>3. Sometimes<br>4. Don't know                                                      |      |

|     |                                                                             |                                                                                                                                                                                                                                                                                                                                                                                                                                                                                                                                                        |  |
|-----|-----------------------------------------------------------------------------|--------------------------------------------------------------------------------------------------------------------------------------------------------------------------------------------------------------------------------------------------------------------------------------------------------------------------------------------------------------------------------------------------------------------------------------------------------------------------------------------------------------------------------------------------------|--|
| 2.5 | How can people get infected with STDs?<br>(Multiple answers possible, tick) | 1. Through blood transfusion<br>2. By sharing razors, blades, and used syringes<br>3. By injecting drugs with used needles<br>4. Through sexual intercourse without a condom<br>5. By sitting at the same desk with an STD-infected person<br>6. By sharing food and drink with an STD-infected person<br>7. By kissing an STD-infected person<br>8. By hugging/holding hands with an STD-infected person<br>9. By using the same toilet as an STD-infected person<br>10. Through sneezing/coughing<br>11. Through sorcery<br>12. Other (Write ..... ) |  |
| 2.6 | Can an STD-infected mother infect a fetus?                                  | 1. Yes<br>2. No<br>3. Don't know                                                                                                                                                                                                                                                                                                                                                                                                                                                                                                                       |  |
| 2.7 | Can an STD be transmitted from mother to child through breastfeeding?       | 1. Yes<br>2. No<br>3. Don't know                                                                                                                                                                                                                                                                                                                                                                                                                                                                                                                       |  |
| 2.8 | Can a healthy, strong person have the STD?                                  | 1. Yes<br>2. No<br>3. Don't know                                                                                                                                                                                                                                                                                                                                                                                                                                                                                                                       |  |
| 2.9 | What is the treatment for STD?<br>(Multiple answers possible, tick)         | 1. Don't know<br>2. There is no treatment for STDs<br>3. Only AIDS/HIV has no cure<br>4. Allopathic/foreign/Western medicine<br>5. Traditional (herbal/tree-based)<br>6. Spiritual healing (exorcism/amulets)<br>7. Sexual intercourse with a virgin                                                                                                                                                                                                                                                                                                   |  |

|      |                                                                                                             |                                                                                                                                                                                                                                                                                                        |  |
|------|-------------------------------------------------------------------------------------------------------------|--------------------------------------------------------------------------------------------------------------------------------------------------------------------------------------------------------------------------------------------------------------------------------------------------------|--|
|      |                                                                                                             | 8. Other (Write ..... )                                                                                                                                                                                                                                                                                |  |
| 2.10 | What are the ways to prevent STD?<br>(Multiple answers possible, tick)                                      | 1. Don't know<br>2. Safe blood transfusion<br>3. Not sharing razors, blades, syringes<br>4. Avoiding injecting drugs with used needles<br>5. Using condoms during sexual intercourse<br>6. Being faithful to one sexual partner<br>7. Not getting circumcised<br>8. Sorcery<br>9. Other (Write ..... ) |  |
| 2.11 | Do you want to hide your or family member's STD?                                                            | 1. Yes<br>2. No<br>3. Other (.....)                                                                                                                                                                                                                                                                    |  |
| 2.12 | Do you think hiding this disease is a safe or dangerous step?                                               | 1. Safe<br>2. Dangerous<br>3. Don't know                                                                                                                                                                                                                                                               |  |
| 2.13 | If you are infected with such a STD, where do you seek treatment from?<br>(Multiple answers possible, tick) | 1. Private Doctor/Clinic<br>2. Government Doctor/Clinic<br>3. Hospital (Govt + non-govt)<br>4. Pharmacy<br>5. Public Health Hospital<br>6. NGO<br>7. Other (Write ..... )                                                                                                                              |  |

| <b>3. Use of Condoms/Barrier/protection</b> |                                                                                                                      |                                                                                                                                                                       |             |
|---------------------------------------------|----------------------------------------------------------------------------------------------------------------------|-----------------------------------------------------------------------------------------------------------------------------------------------------------------------|-------------|
| <b>Question No.</b>                         | <b>Question</b>                                                                                                      | <b>Coding Category</b>                                                                                                                                                | <b>Code</b> |
| 3.1                                         | Does your partner use condoms during sexual intercourse?<br><br>(If answer is 'Yes' go to 5.2 and if 'No' go to 5.5) | 1. Yes<br>2. No<br>3. Some do, some don't                                                                                                                             |             |
| 3.2                                         | Who decides on condom use?                                                                                           | 1. The client<br>2. You yourself<br>3. Other                                                                                                                          |             |
| 3.3                                         | How often do you use condoms?                                                                                        | 1. Every time<br>2. Sometimes                                                                                                                                         |             |
| 3.4                                         | What are the main reasons for using condoms?<br><br>(Multiple answers possible, tick)                                | 1. To prevent pregnancy<br>2. To prevent AIDS<br>3. To prevent sexually transmitted infections<br>4. To encourage a partner to use a condom<br>5. Other (Write..... ) |             |
| 3.5                                         | Where do you get condoms from?                                                                                       | 1. Public Health Center<br>2. Pharmacy<br>3. Shop<br>4. Bar<br>5. Friend/relative<br>6. Nearby NGO<br>7. Nearby hospital/clinic<br>8. Other (Write..... )             |             |
| 3.6                                         | What are the reasons for not using a condom?<br><br>(Multiple answers possible, tick)                                | 1. Condoms hinder sexual pleasure<br>2. Condoms break during sexual intercourse<br>3. Clients may decrease if encouraged to use condoms<br>4. Other (Write..... )     |             |

Interviewer's name: .....

Signature: .....

Date: .....
